# Supplementary material for: Zwitterionic indenylammonium with carbon-centred reactivity towards reversible CO2 binding and catalytic reduction
Source: Royal Society of Chemistry journal article supplement (doi:10.1039/c7ob00364a), 2017-01-01
Supplement: c7ob00364a1.pdf [file c7ob00364a1.pdf]

Electronic Supplementary Information for

## **Zwitterionic indenylammonium with carbon-centred reactivity toward reversible CO<sub>2</sub> binding and catalytic reduction**

Yanxin Yang, Linfan Yan, Qinyu Xie, Qiuming Liang and Datong Song\*

Davenport Chemical Research Laboratories, Department of Chemistry, University of Toronto, 80 St. George Street, Toronto, Ontario, M5S 3H6, Canada

E-mail: [dsong@chem.utoronto.ca](mailto:dsong@chem.utoronto.ca)

**Table of Contents**

|                                                                    |              |
|--------------------------------------------------------------------|--------------|
| 1. $^1\text{H}$ and $^{13}\text{C}$ NMR spectra of <b>1</b>        | page S3      |
| 2. $^1\text{H}$ and $^{13}\text{C}$ NMR spectra of <b>2</b>        | page S4      |
| 3. $^1\text{H}$ and $^{13}\text{C}$ NMR spectra of <b>3</b>        | page S5      |
| 4. $^1\text{H}$ and $^{13}\text{C}$ NMR spectra of <b>4</b>        | page S6-S7   |
| 5. Additional information of <b>5</b>                              | page S8-S9   |
| 6. Spectra related to the catalytic hydroboration of $\text{CO}_2$ | page S10-S16 |

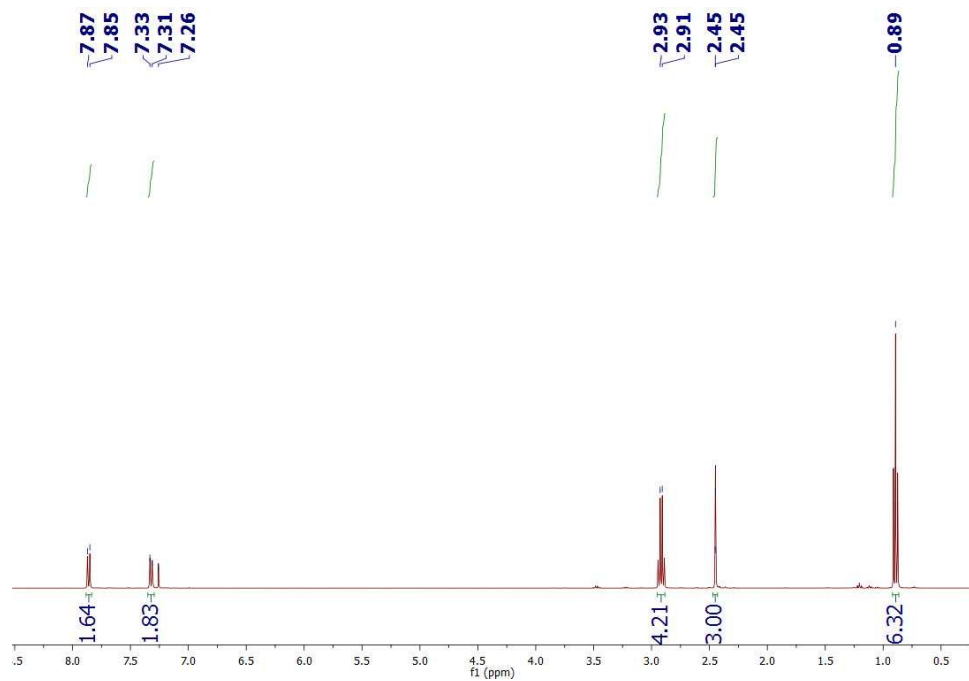

Figure S1.  $^1\text{H}$  NMR spectrum of **1** in  $\text{CDCl}_3$

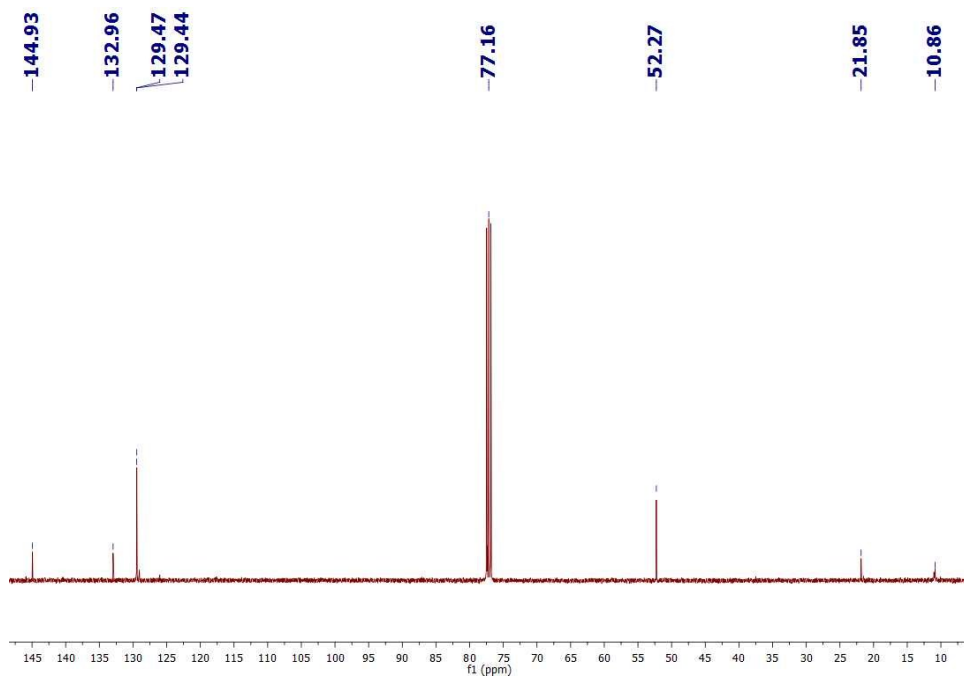

Figure S2.  $^{13}\text{C}$  NMR spectrum of **1** in  $\text{CDCl}_3$

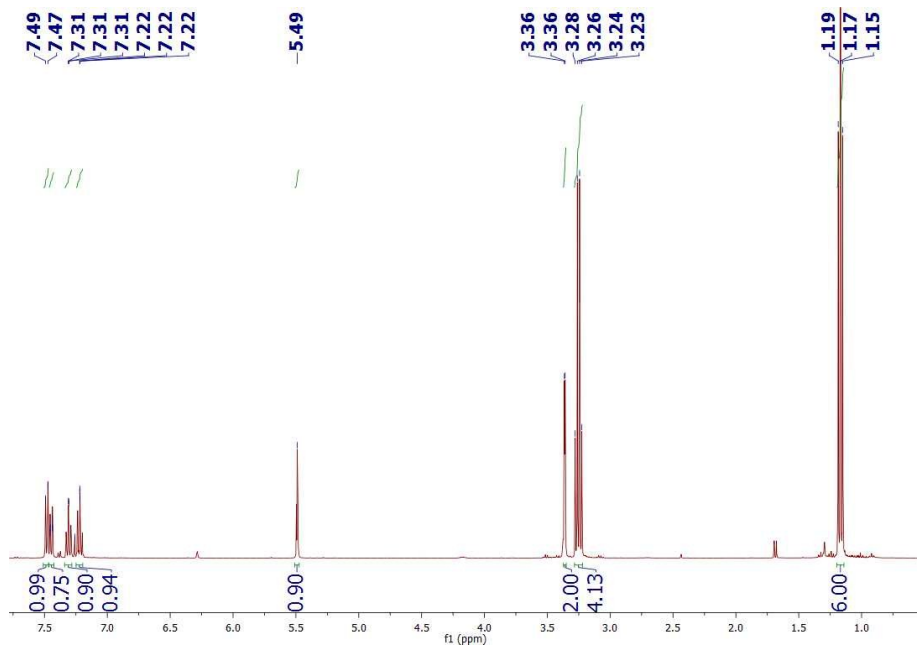

Figure S3.  $^1\text{H}$  NMR spectrum of **2** in  $\text{CDCl}_3$

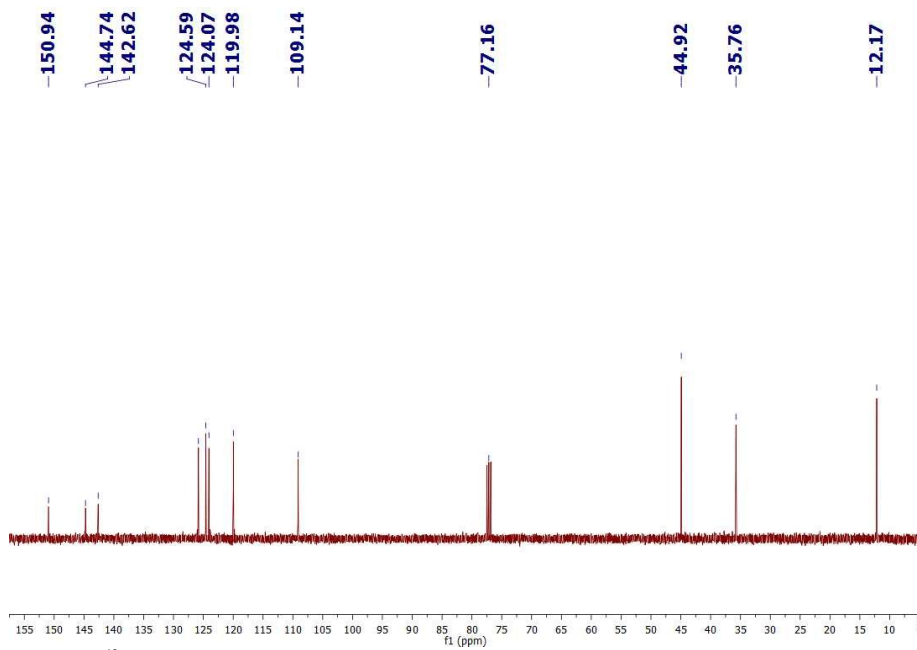

Figure S4.  $^{13}\text{C}$  NMR spectrum of **2** in  $\text{CDCl}_3$

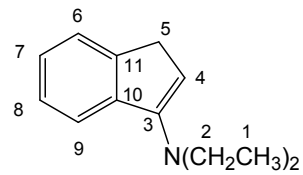

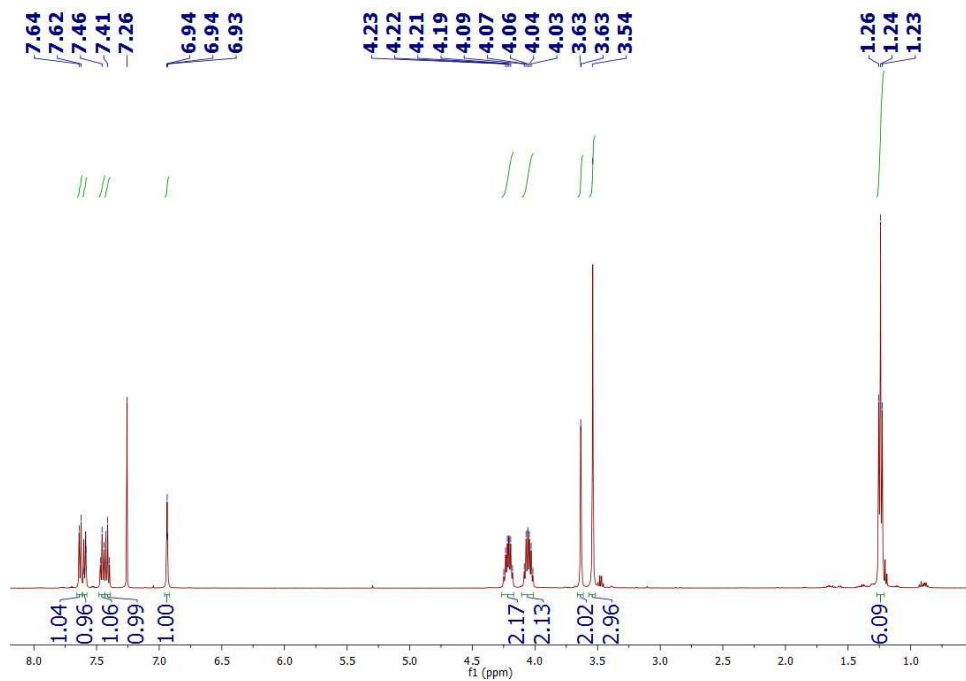

Figure S5. <sup>1</sup>H NMR spectrum of 3 in CDCl<sub>3</sub>

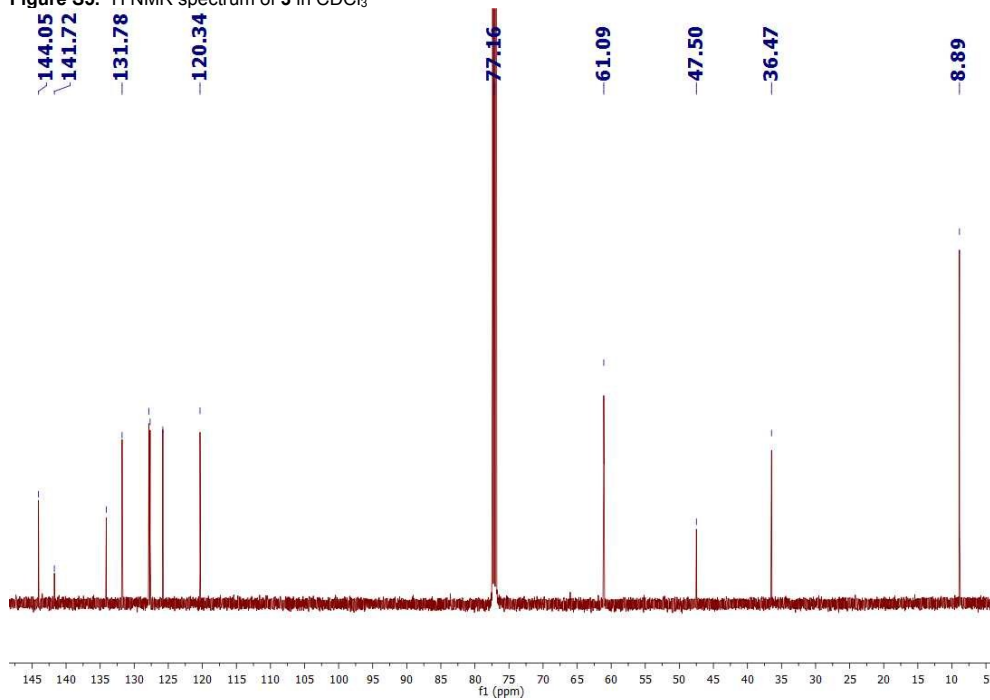

Figure S6. <sup>13</sup>C NMR spectrum of 3 in CDCl<sub>3</sub>

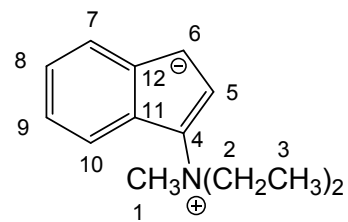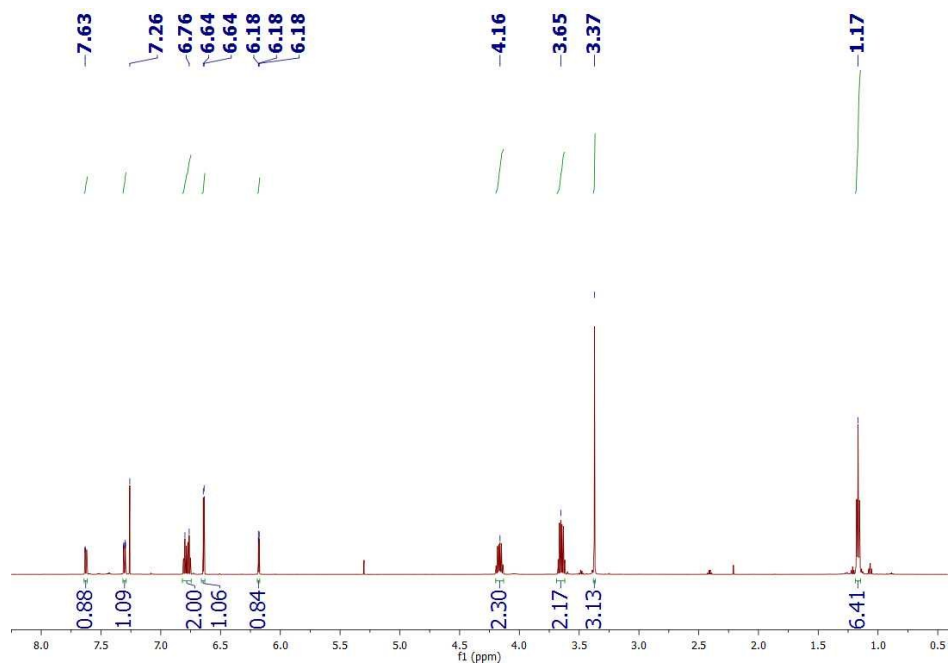

Figure S7. <sup>1</sup>H NMR spectrum of **4** in CDCl<sub>3</sub>

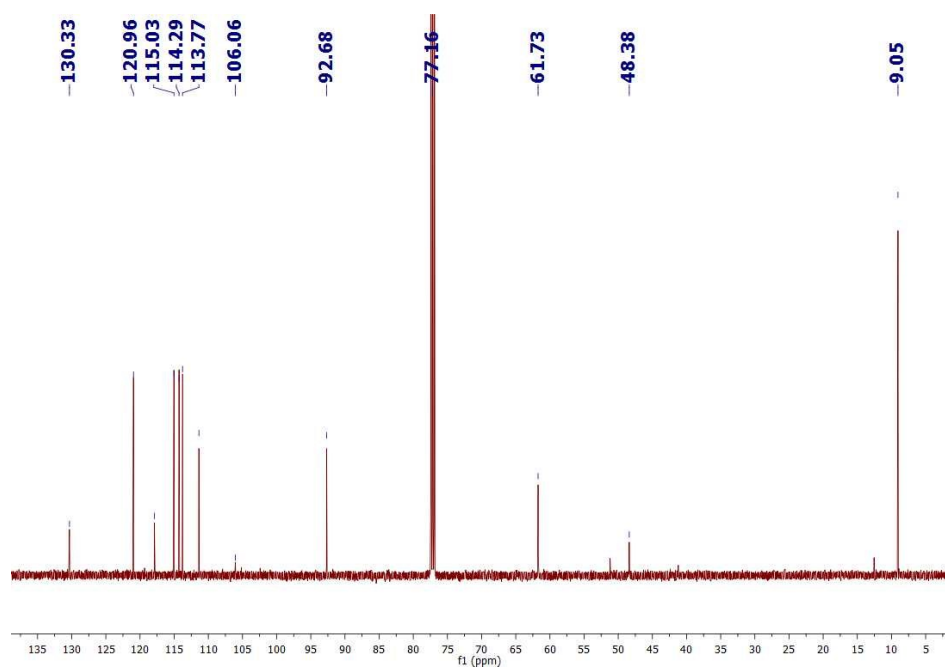

Figure S8. <sup>13</sup>C NMR spectrum of **4** in CDCl<sub>3</sub>

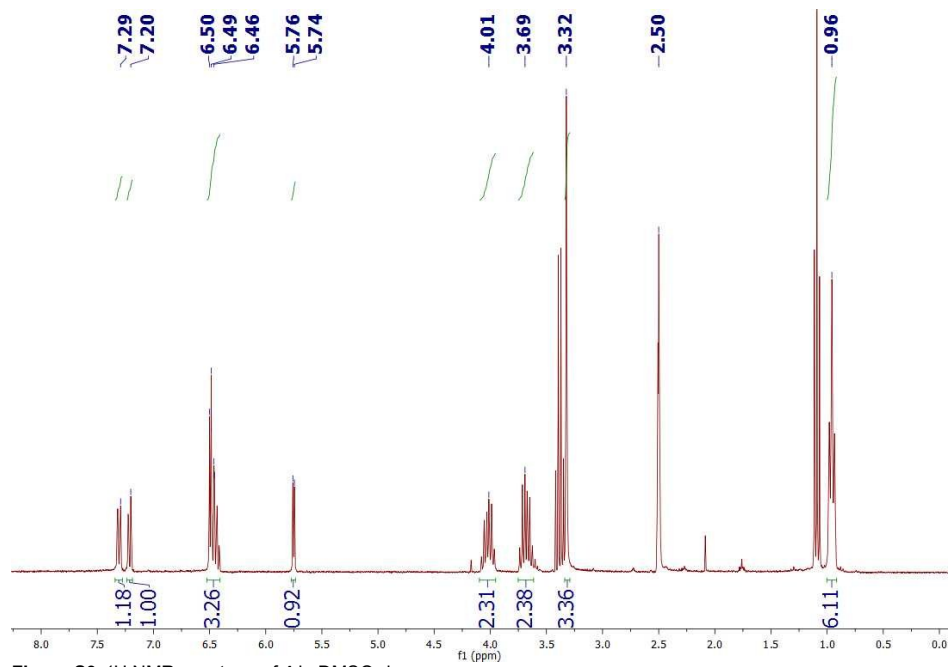

Figure S9. <sup>1</sup>H NMR spectrum of 4 in DMSO-d<sub>6</sub>

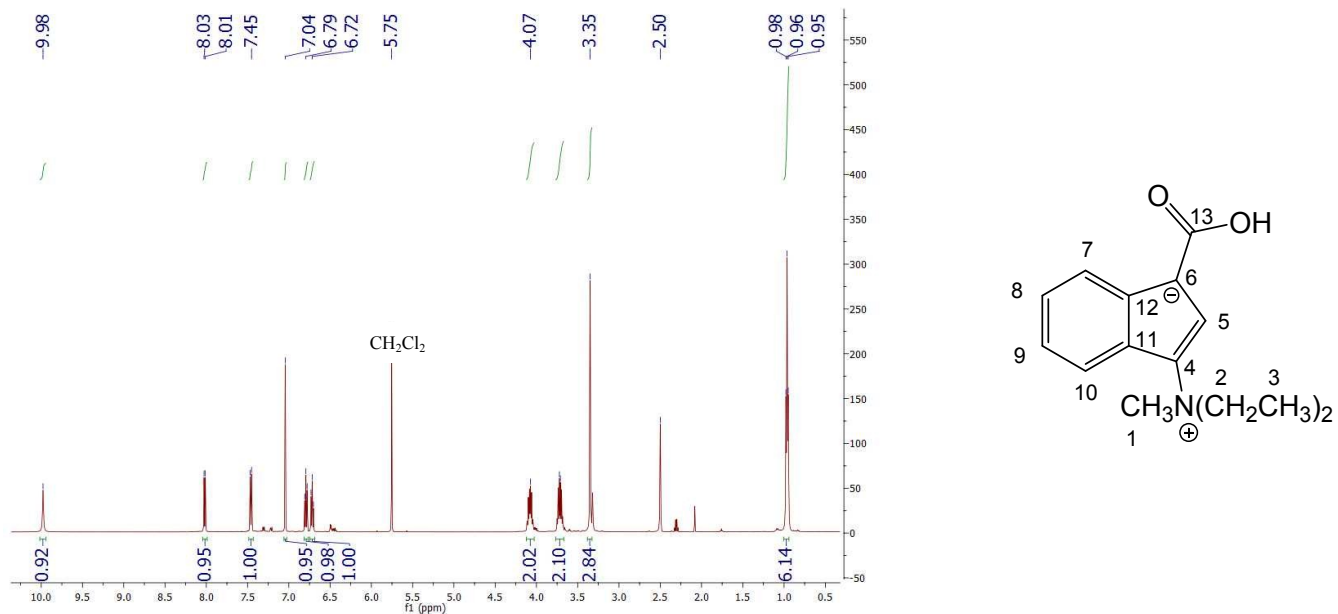

**Figure S10.**  $^1\text{H}$  NMR spectrum of **5** in  $\text{DMSO-d}_6$ . The peak at 9.98 ppm in the  $^1\text{H}$  NMR spectrum corresponds to a carboxylic acid.

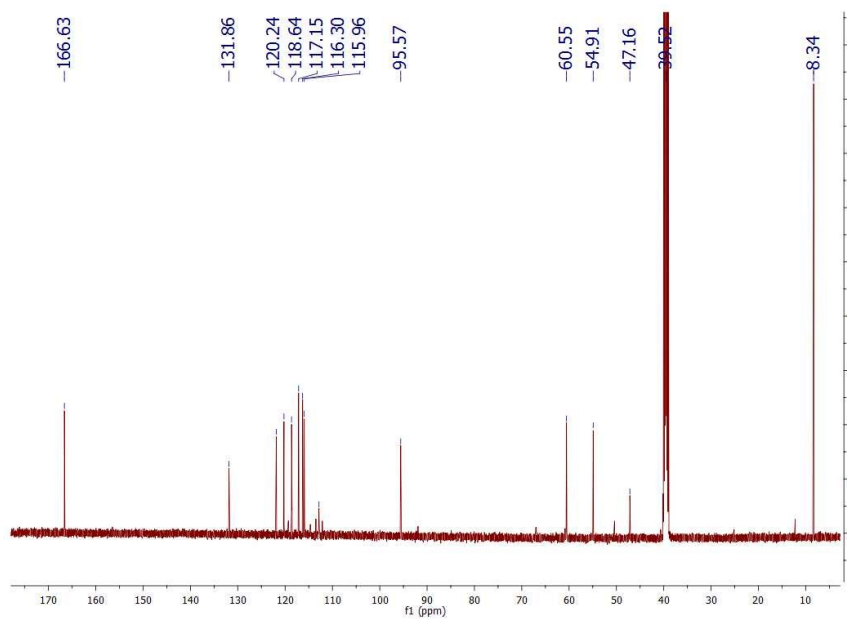

**Figure S11.**  $^{13}\text{C}$  NMR spectrum of **5** in  $\text{DMSO-d}_6$ . The  $^{13}\text{C}$  NMR spectrum confirms the formation of a carboxylic acid species with a new peak a 166.63 ppm.



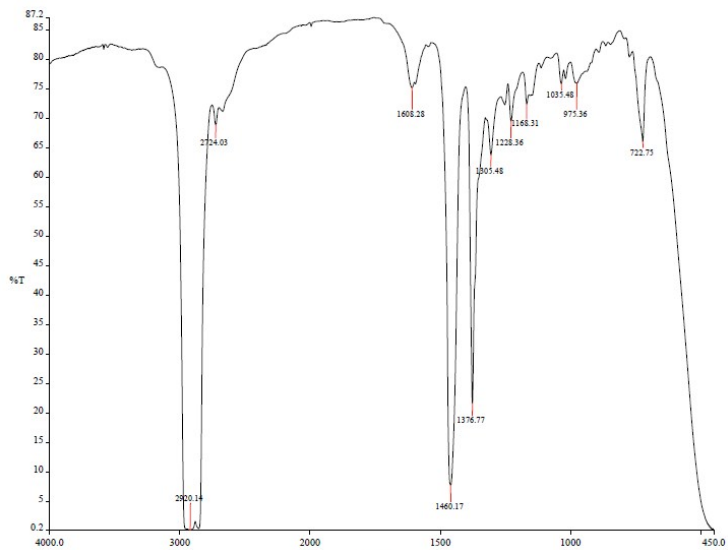

Figure S12. IR spectrum of **5** in nujol.

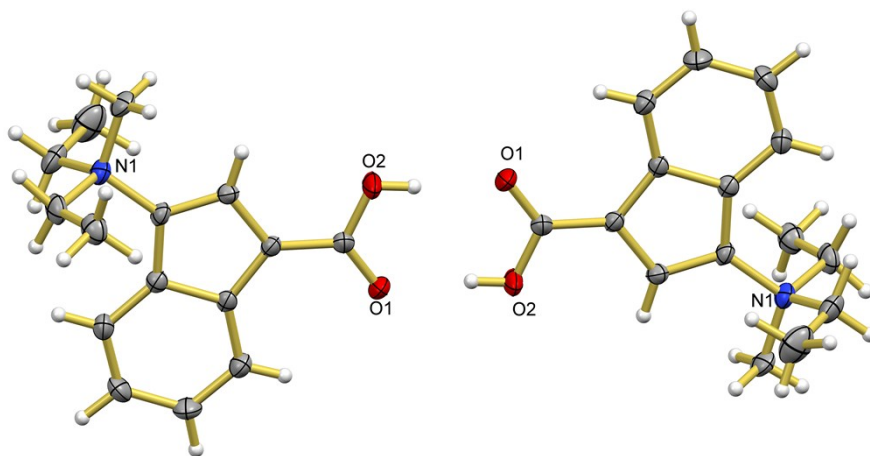

Figure S13. The hydrogen bonded pair in the crystal lattice of **5**. The intermolecular O1–O2 distance is  $\sim 2.6$  Å.

Table S1. Selected crystallographic data of **5**:

|                                            | <b>5</b>                             |
|--------------------------------------------|--------------------------------------|
| Formula                                    | $C_{15}H_{19}NO_2 \cdot 0.5CH_2Cl_2$ |
| FW                                         | 287.77                               |
| <i>T</i> (K)                               | 150(2)                               |
| space group                                | $P2_1/n$                             |
| <i>a</i> (Å)                               | 7.8393(9)                            |
| <i>b</i> (Å)                               | 10.837(1)                            |
| <i>c</i> (Å)                               | 17.382(2)                            |
| $\alpha$ (deg)                             | 90                                   |
| $\beta$ (deg)                              | 94.666(5)                            |
| $\gamma$ (deg)                             | 90                                   |
| <i>V</i> (Å <sup>3</sup> )                 | 1471.7(3)                            |
| <i>Z</i>                                   | 4                                    |
| <i>D<sub>c</sub></i> (g cm <sup>-3</sup> ) | 1.299                                |
| $\mu$ (mm <sup>-1</sup> )                  | 0.259                                |
| no. of refln collected                     | 12831                                |
| no. of indept refin                        | 3347                                 |
| GOF on $F^2$                               | 1.012                                |
| $R$ [ $I > 2\sigma(I)$ ]                   | $R_1 = 0.0664$                       |
|                                            | $wR_2 = 0.1285$                      |
| $R$ (all data)                             | $R_1 = 0.1588$                       |
|                                            | $wR_2 = 0.1635$                      |

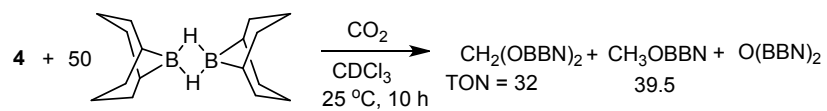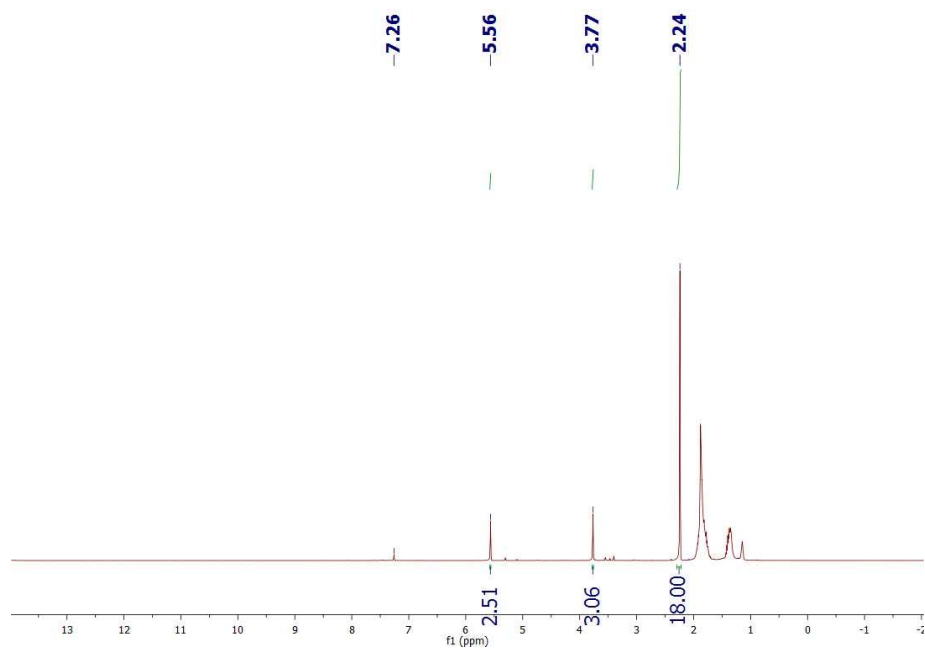

Figure S14.  $^1\text{H}$  NMR spectrum of the final reaction mixture above.

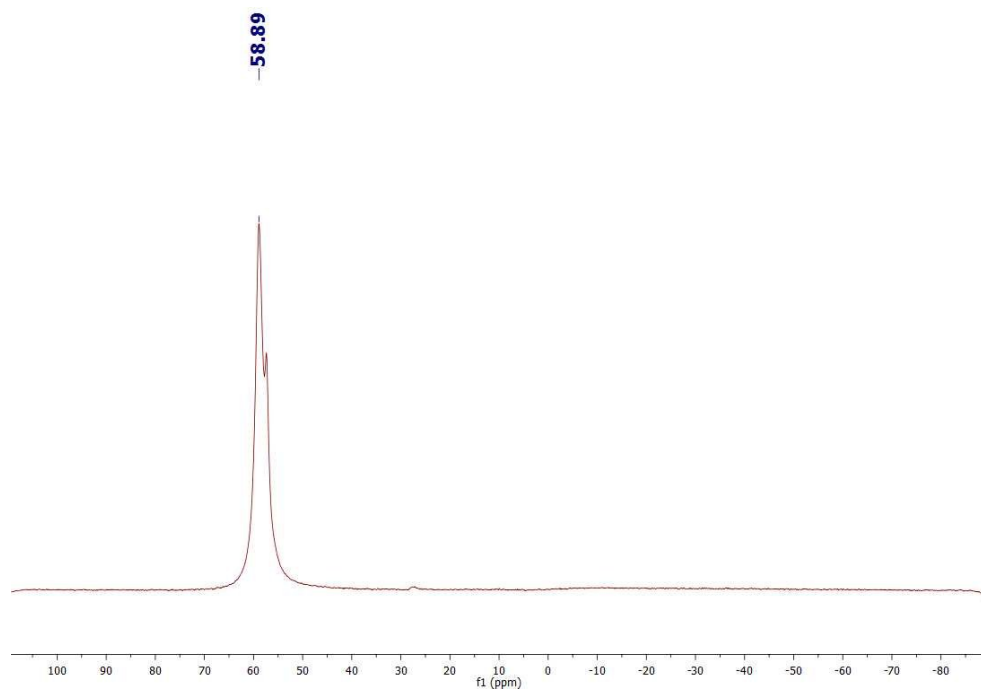

Figure S15.  $^{11}\text{B}$  NMR spectrum of the final reaction mixture above.

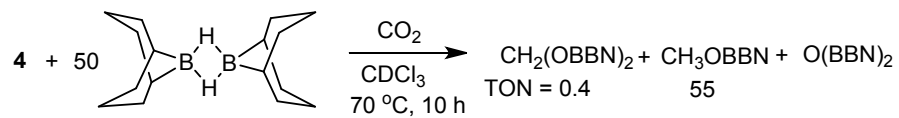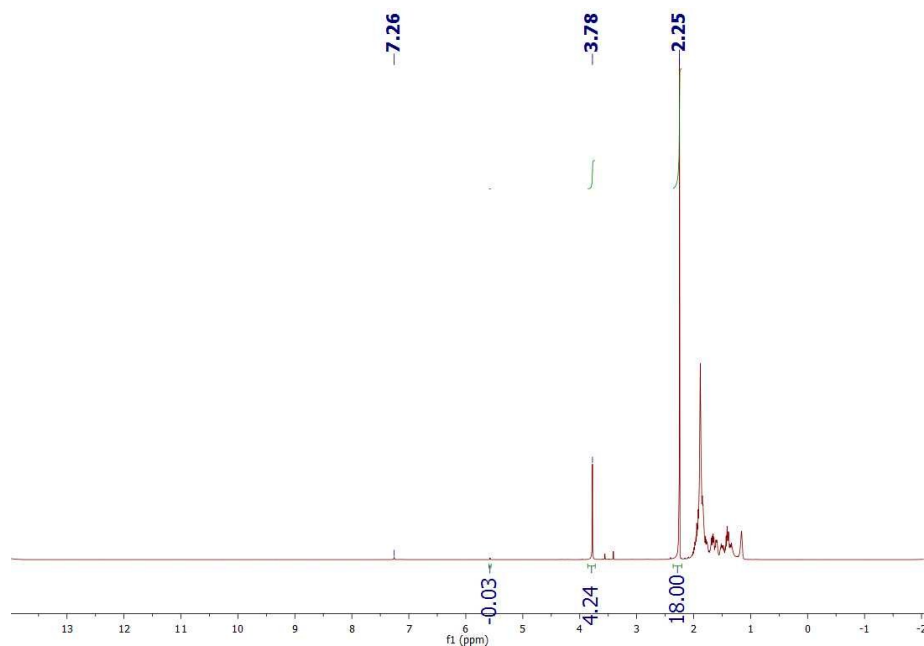

Figure S16.  $^1\text{H}$  NMR spectrum of the final reaction mixture above

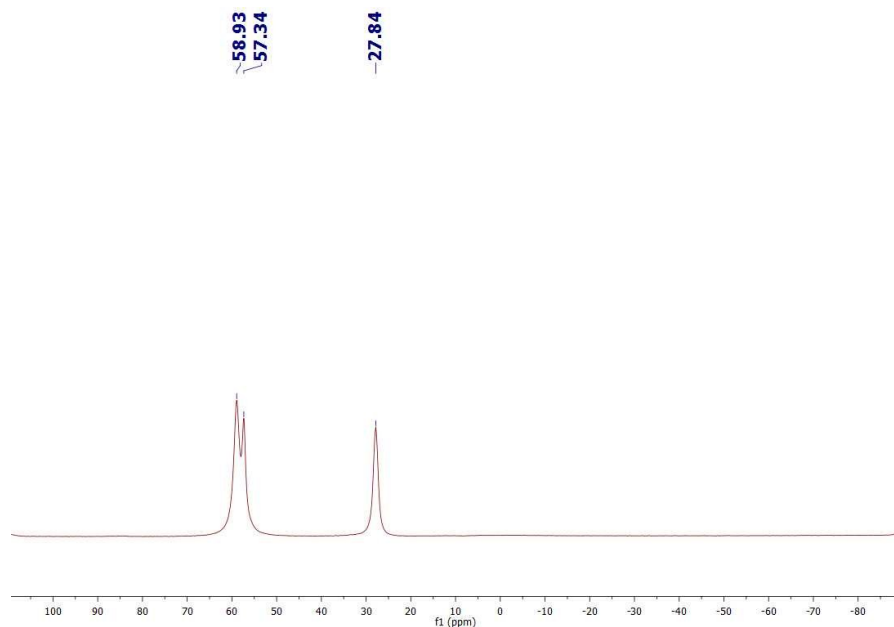

Figure S17.  $^{11}\text{B}$  NMR spectrum of the final reaction mixture above

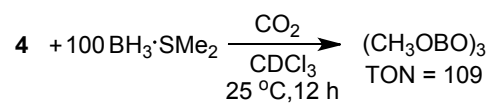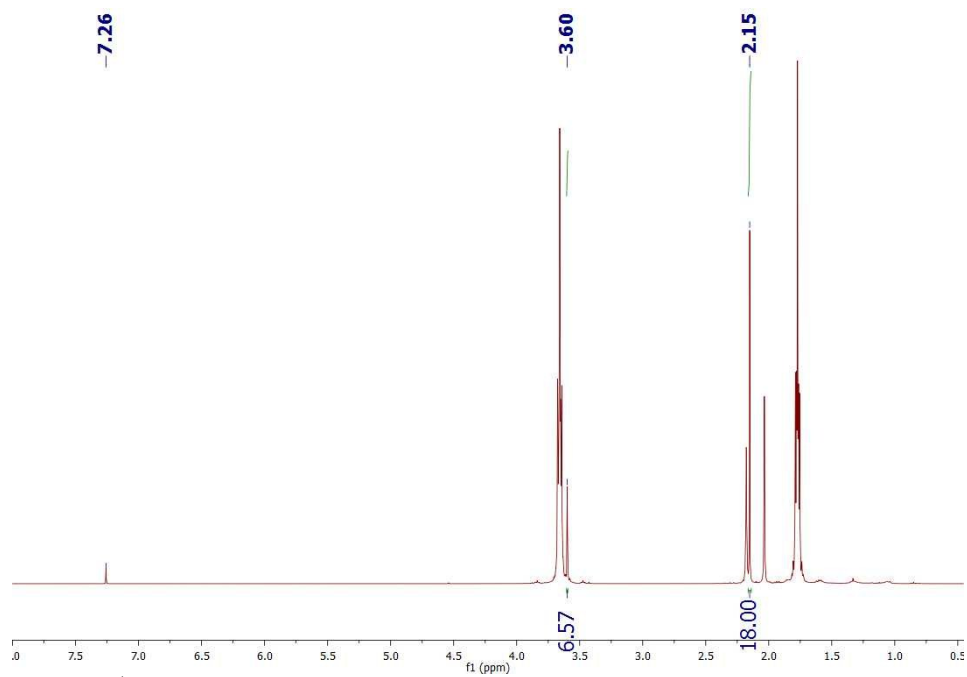

Figure S18.  $^1\text{H}$  NMR spectrum of the final reaction mixture above

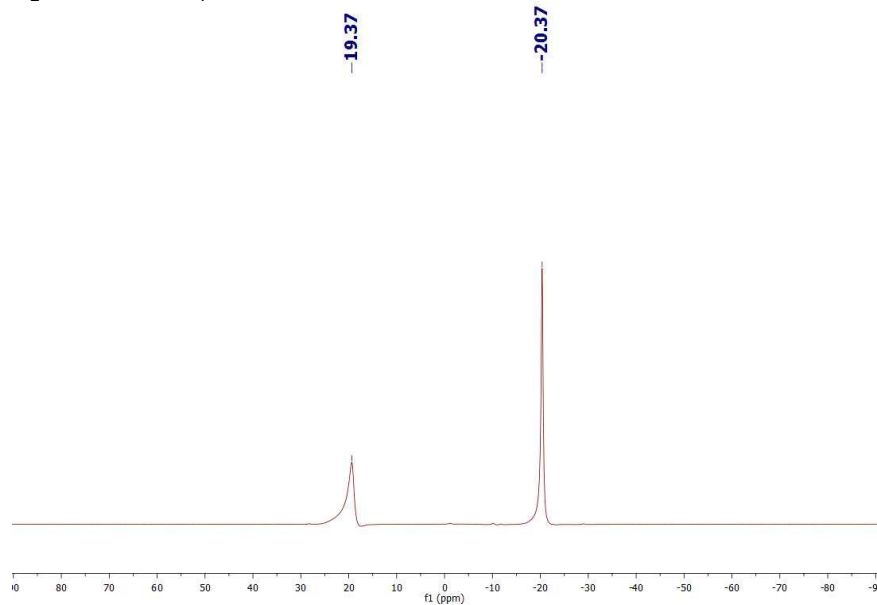

Figure S19.  $^{11}\text{B}$  NMR spectrum of the final reaction mixture above

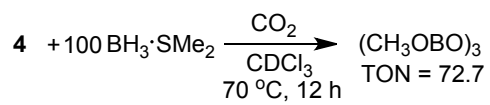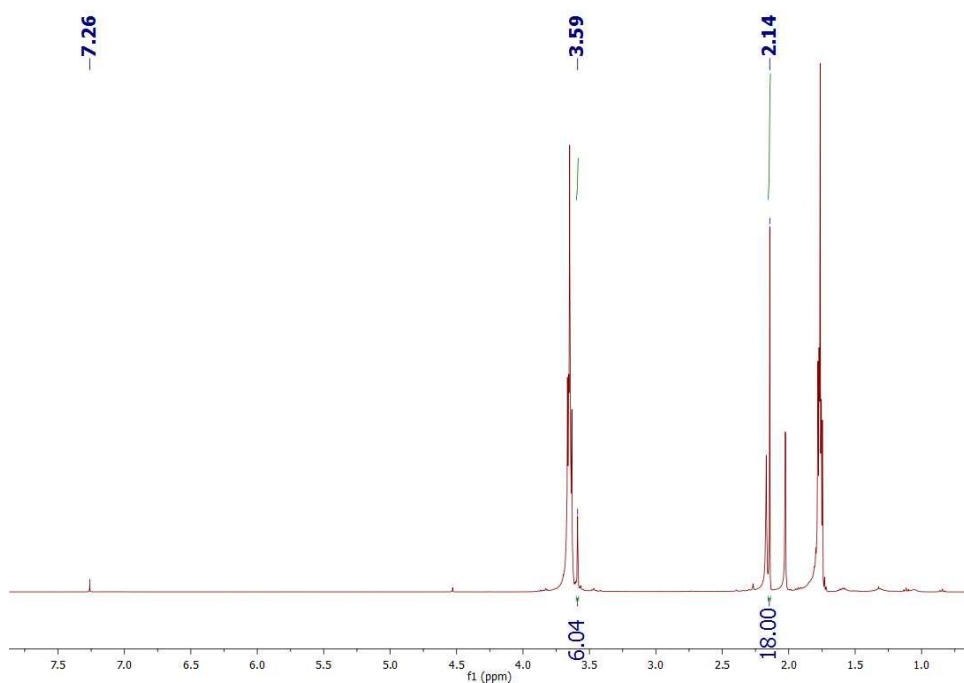

Figure S20. <sup>1</sup>H NMR spectrum of the final reaction mixture above

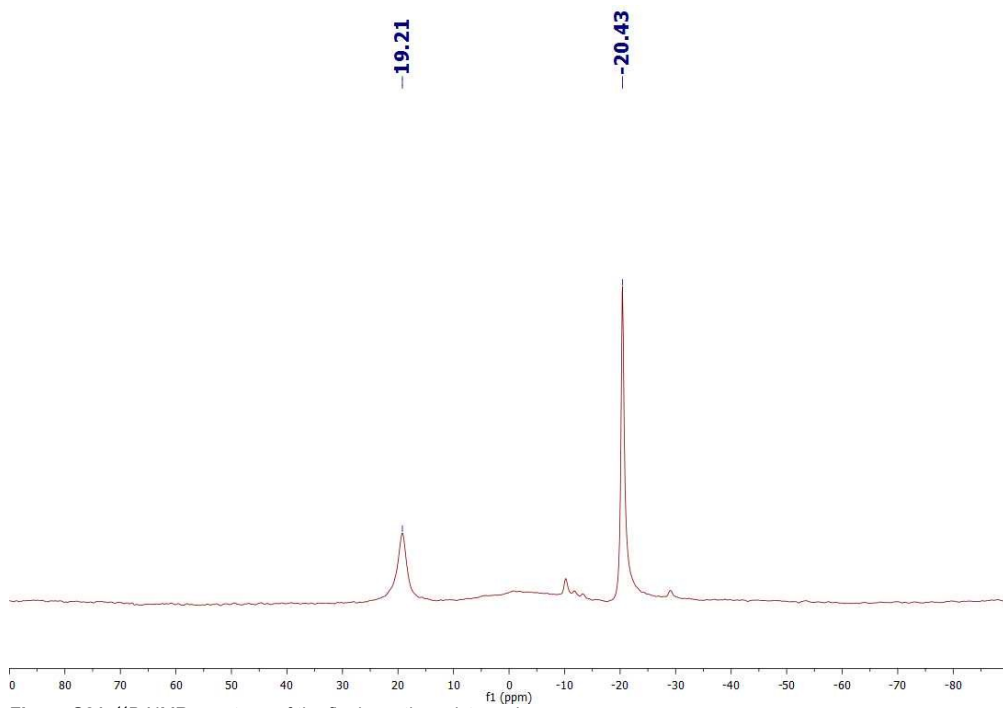

Figure S21. <sup>11</sup>B NMR spectrum of the final reaction mixture above

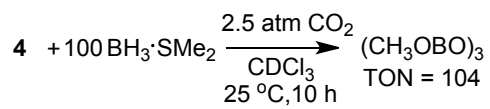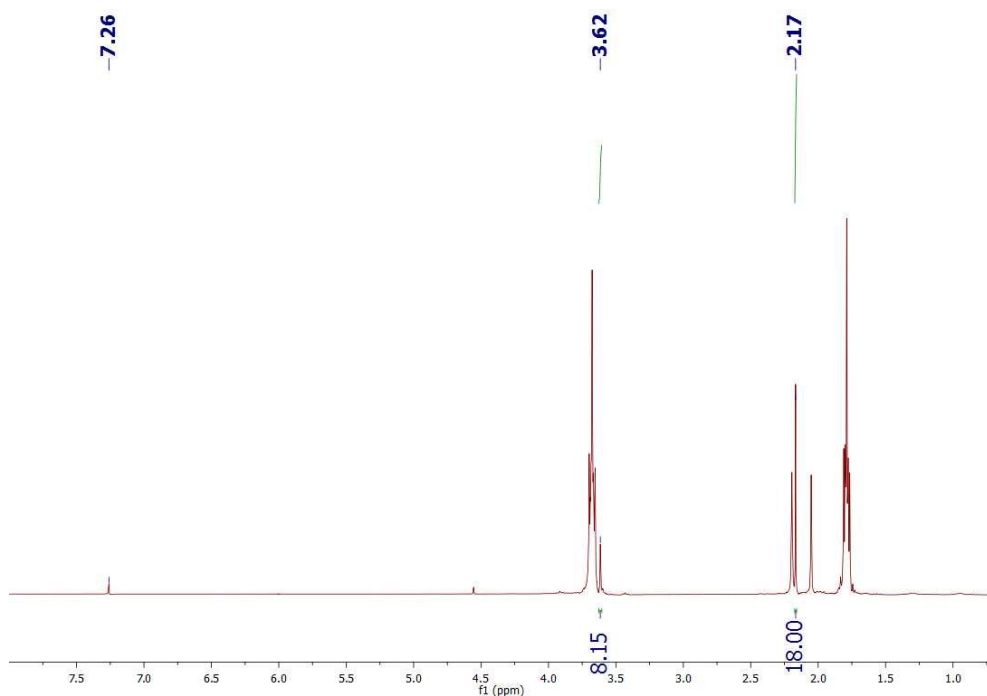

**Figure S22.**  $^1\text{H}$  NMR spectrum of the final reaction mixture above

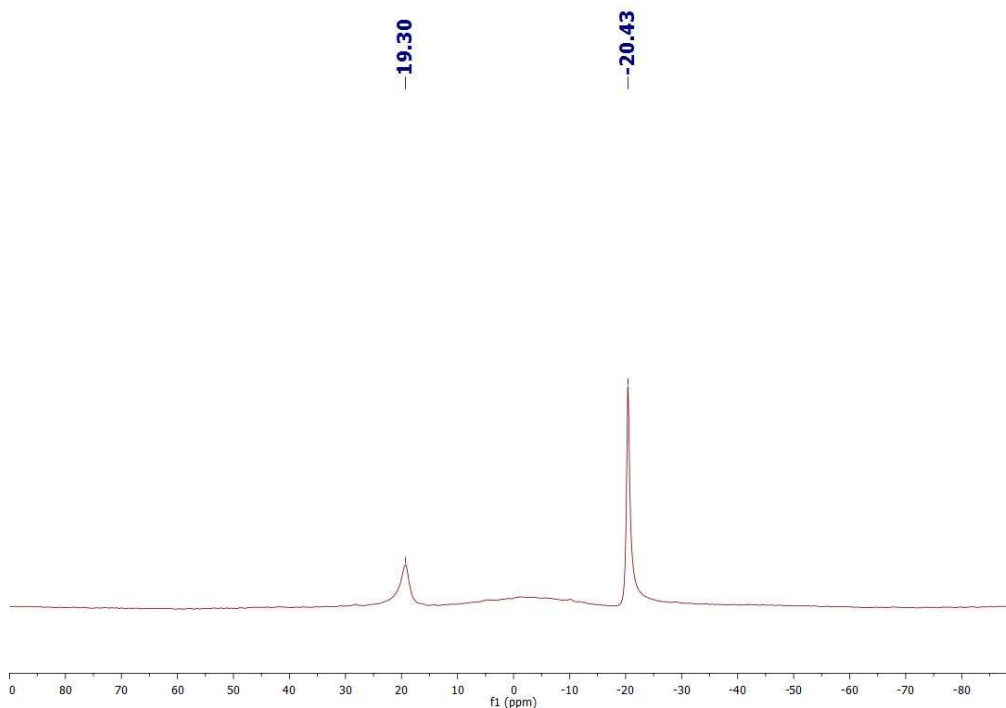

**Figure S23.**  $^{11}\text{B}$  NMR spectrum of the final reaction mixture above

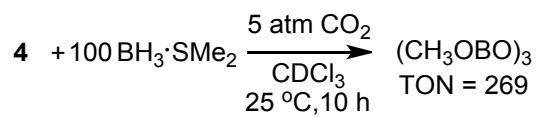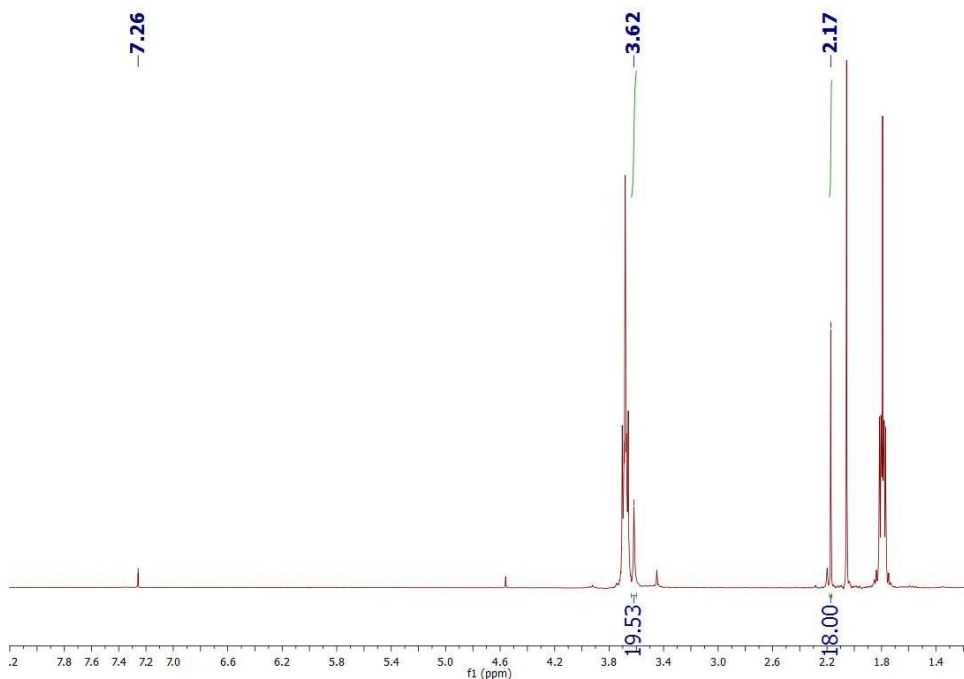

**Figure S24.**  $^1\text{H}$  NMR spectrum of the final reaction mixture above

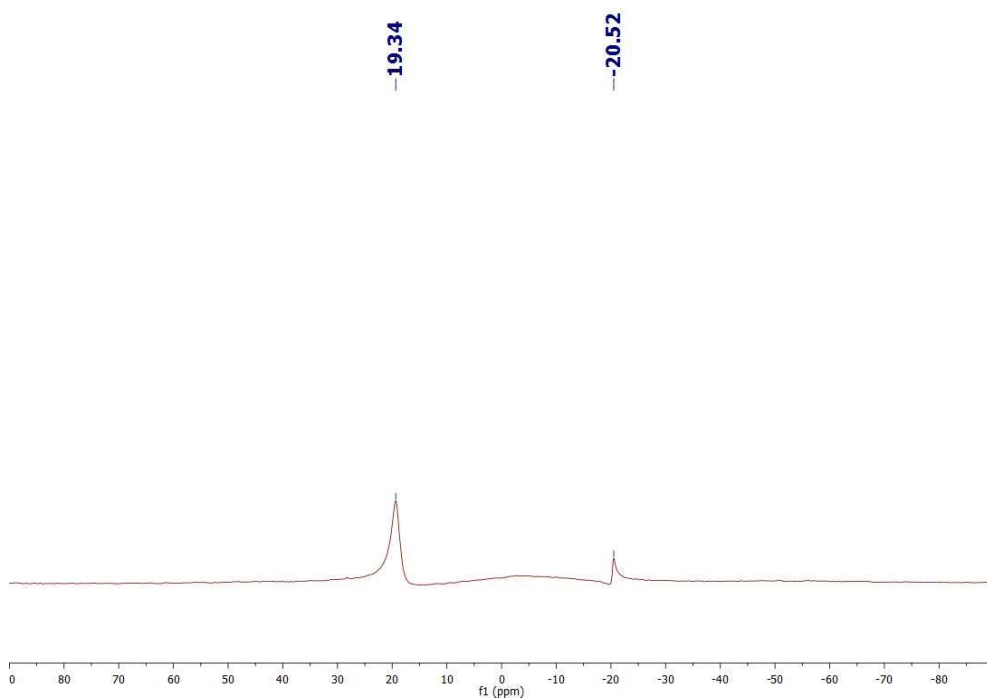

**Figure S25.**  $^{11}\text{B}$  NMR spectrum of the final reaction mixture above

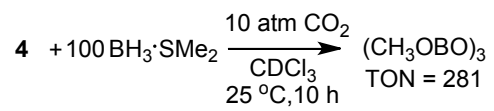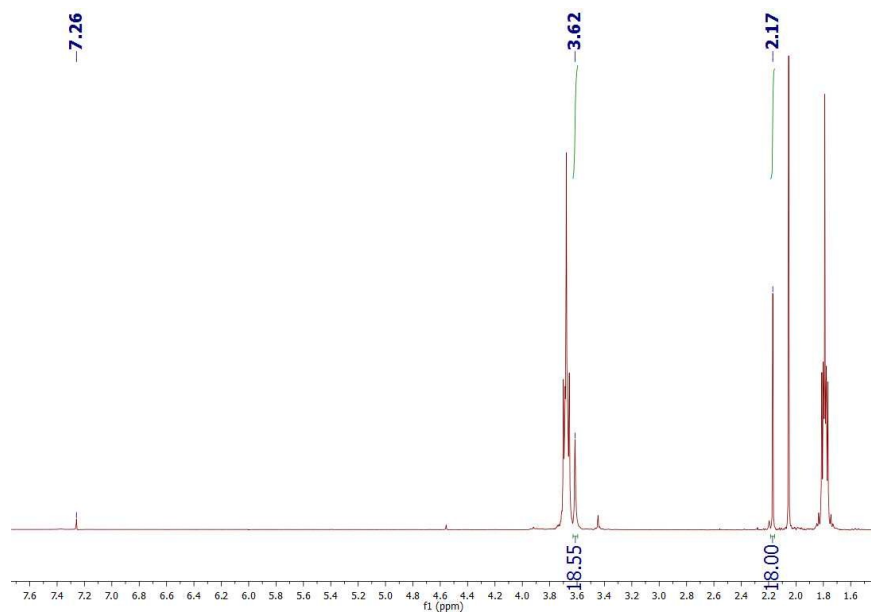

**Figure S26.**  $^1\text{H}$  NMR spectrum of the final reaction mixture above

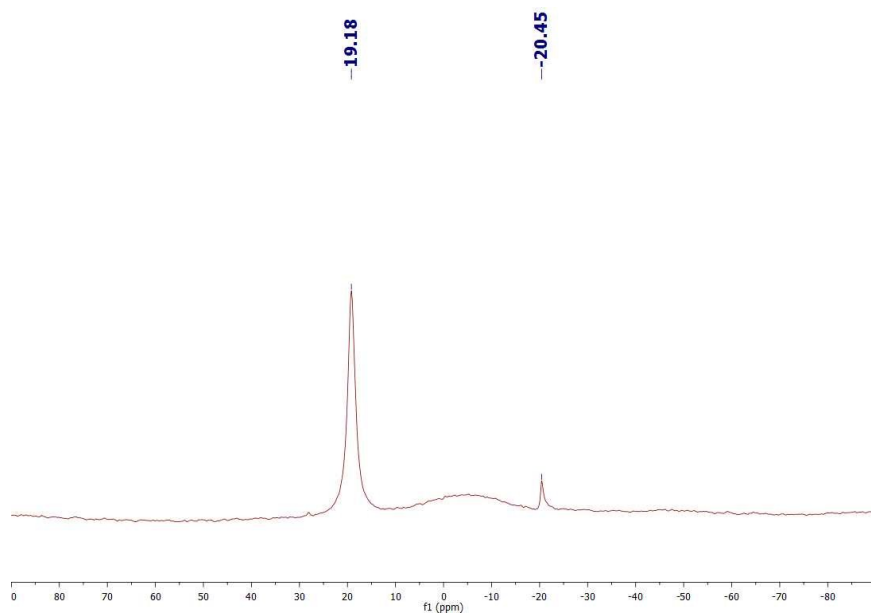

**Figure S27.**  $^{11}\text{B}$  NMR spectrum of the final reaction mixture above
